# Supplementary material for: Italian validation of the SMA independence scale–upper limb module
Source: Springer Nature journal article supplement (doi:10.1007/s00431-025-06207-4), 2025-06-09
Supplement: MOESM2 [file 431_2025_6207_MOESM2_ESM.pdf › 431_2025_6207_MOESM2_ESM.pdf]

[illegible]

**Online Resource 2** Median SMAIS-ULM scores, subdivided by functional status and SMA type, as reported by the whole population of patients. Key to table: Red = >85% of population reaching ceiling/floor effect
