# Supplementary figures and images for: Italian validation of the SMA independence scale–upper limb module
Source: Springer Nature journal article supplement (doi:10.1007/s00431-025-06207-4), 2025-06-09

A

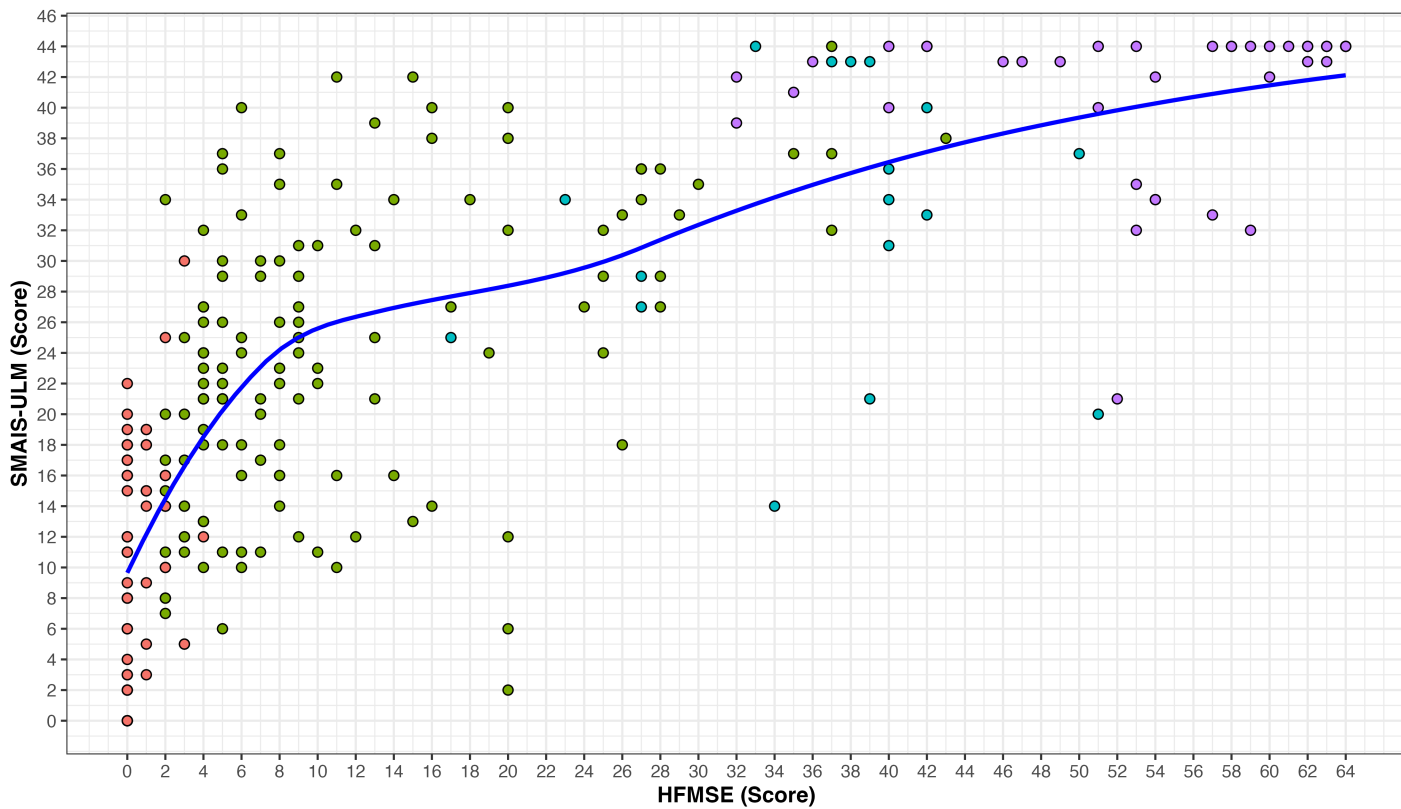

B

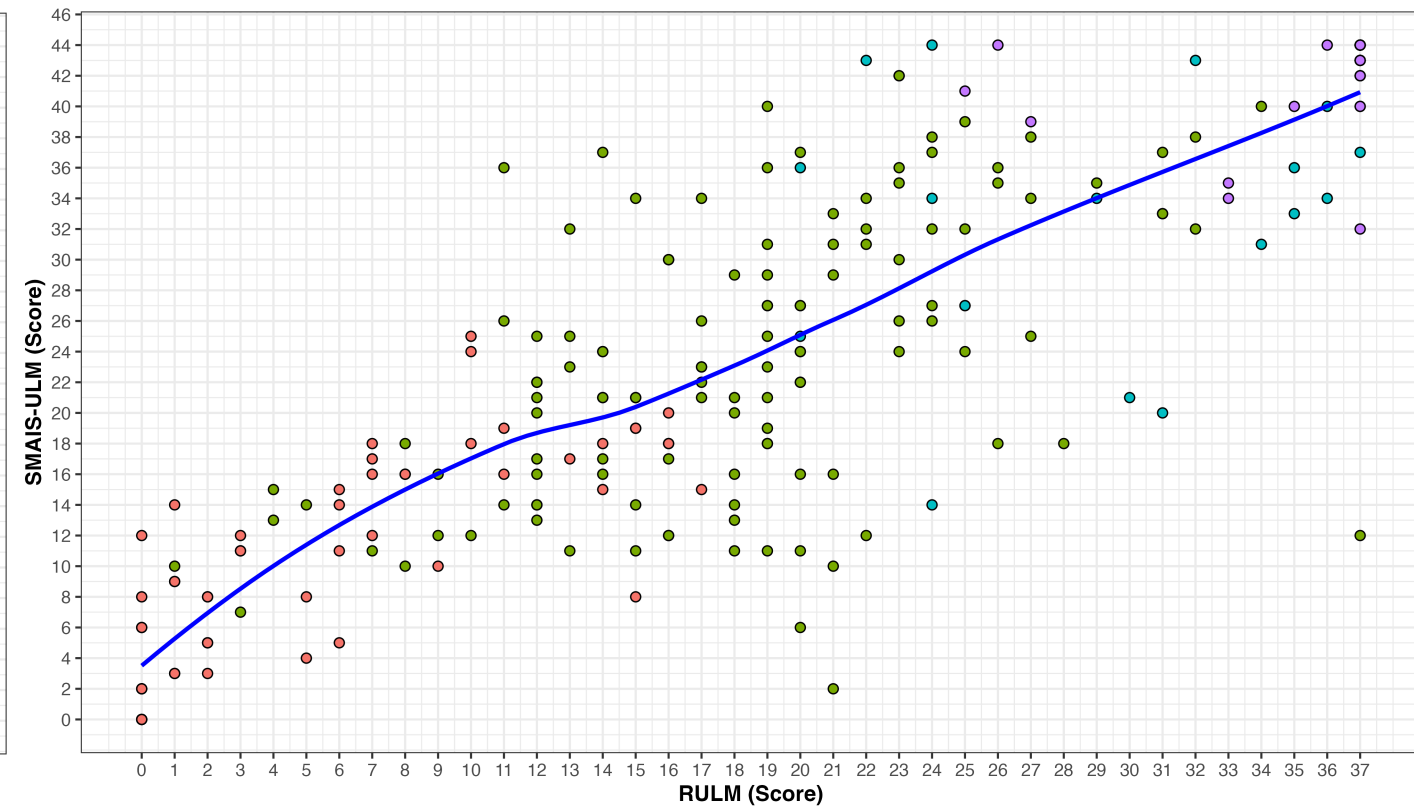

Supplement: MOESM3 [file 431_2025_6207_MOESM3_ESM.pdf › 431_2025_6207_MOESM3_ESM.pdf]
